# Supplementary material for: A micro-scale humanized ventilator-on-a-chip to examine the injurious effects of mechanical ventilation
Source: Royal Society of Chemistry journal article supplement (doi:10.1039/d4lc00143e), 2024-01-01

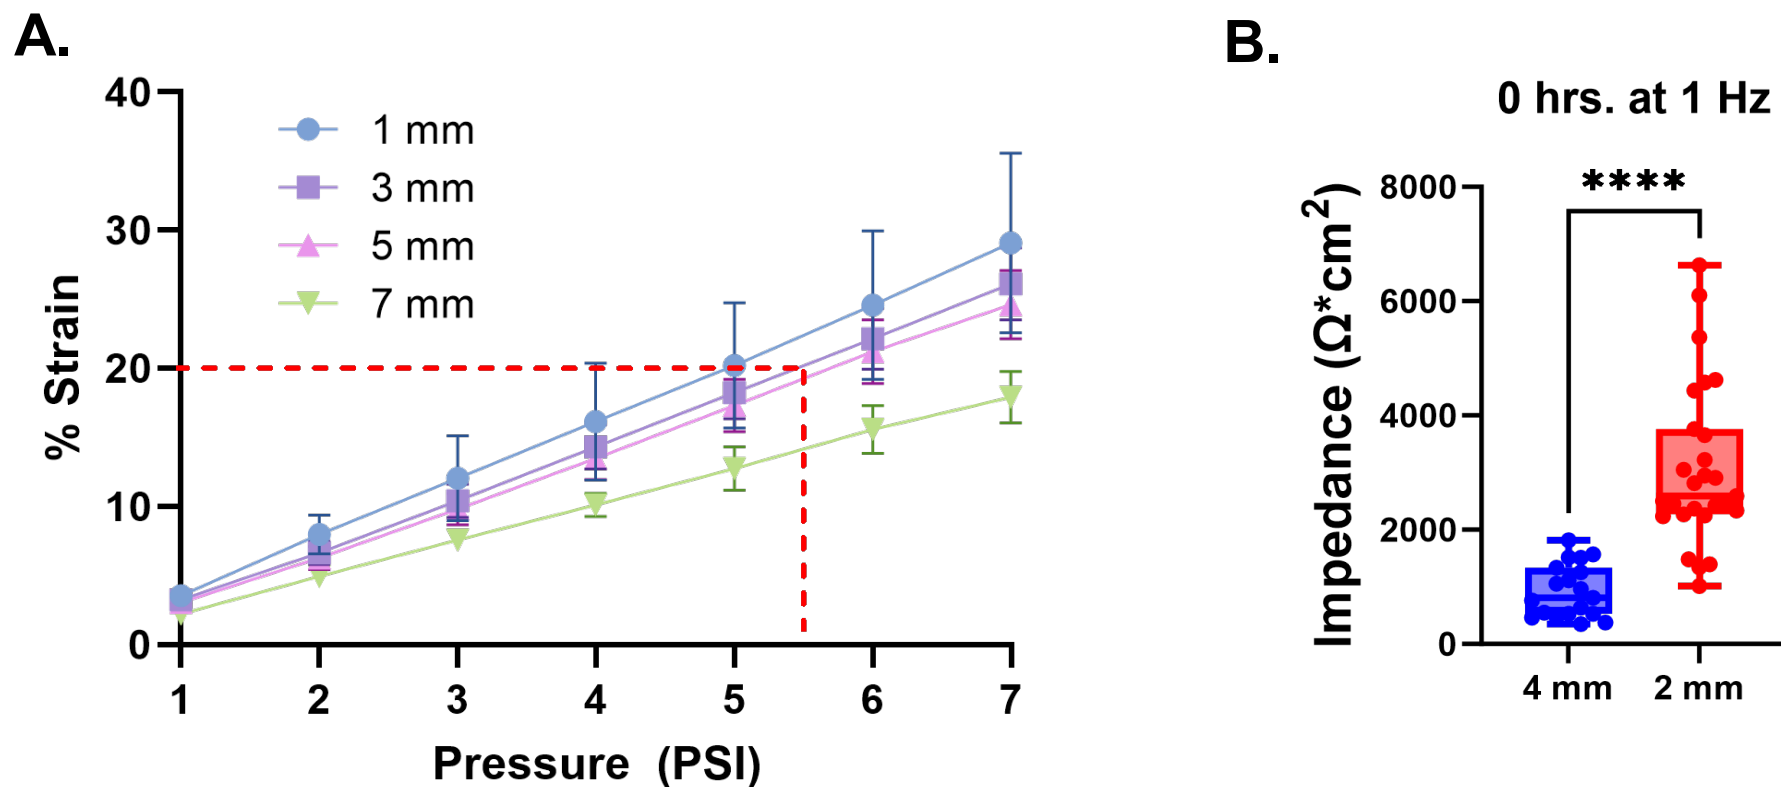

**Supplementary Figure 1. A) Calibration of membrane stretch (% strain) with applied vacuum pressure (PSI). B) Channel geometry alters zero-hour timepoint impedance measurements.** Geometry analysis was performed for all zero-hour impedance measurements at 1 Hz for 2 mm and 4 mm apical channel heights. Data was not normally distributed as tested by Shapiro-Wilk's test. Data were analyzed by Mann-Whitney nonparametric test. \*\*\*\*p<0.0001. Data presented as box and whisker plot. Min to max with all points shown.

**A.****VOLUTRAUMA**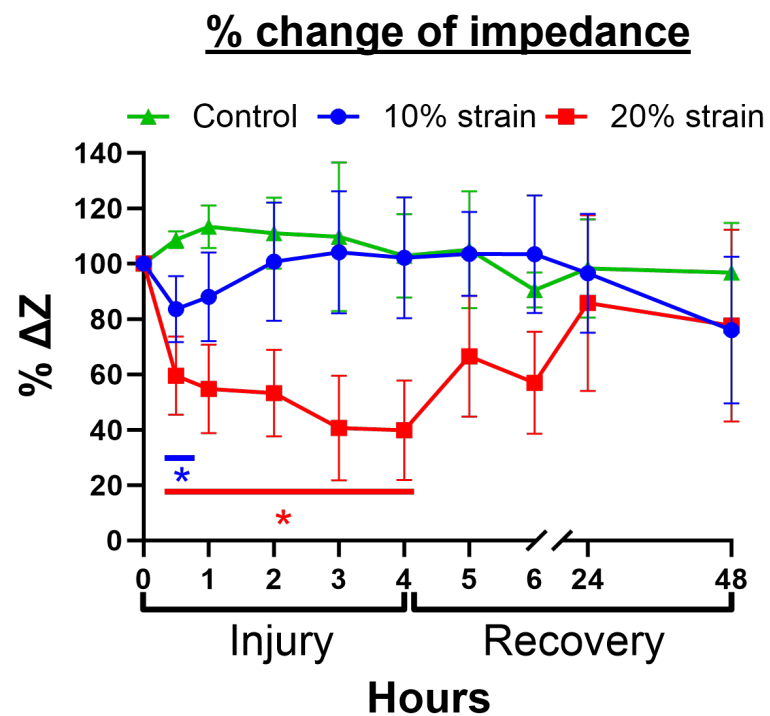**B.****BAROTRAUMA**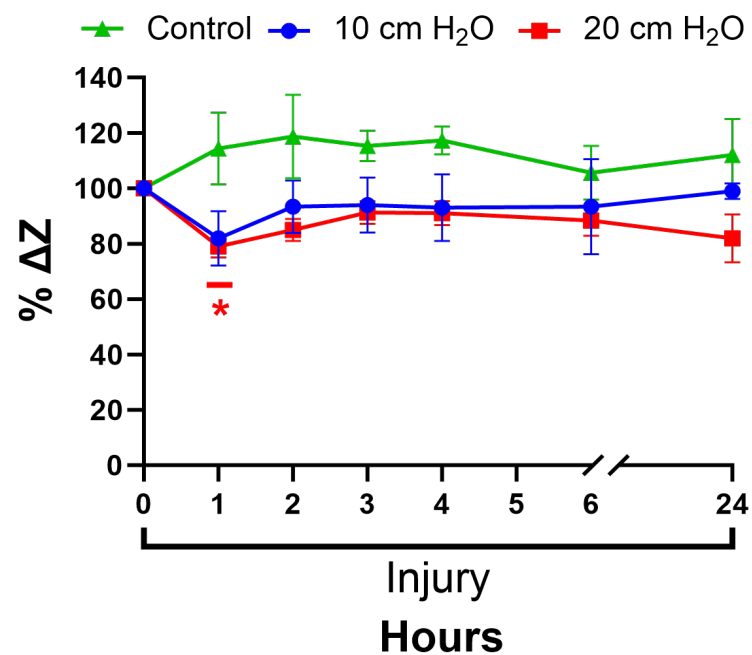**Actual impedance values**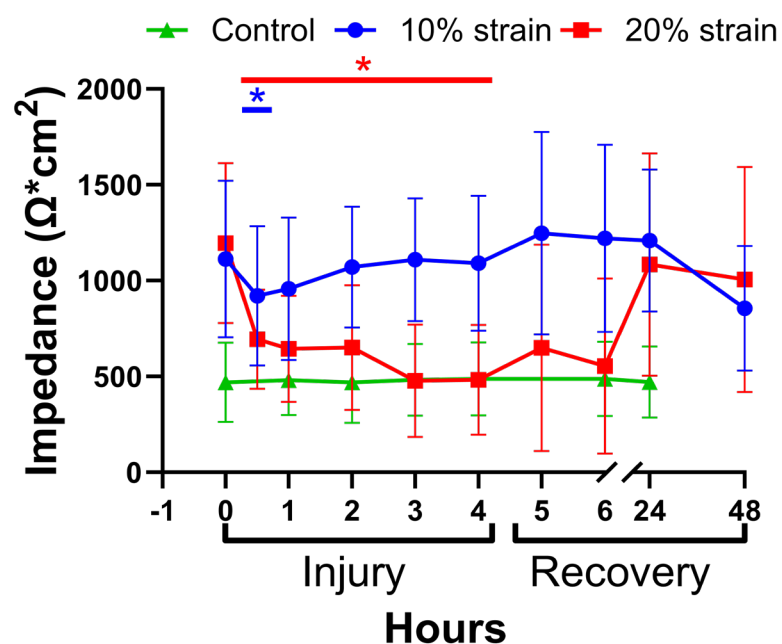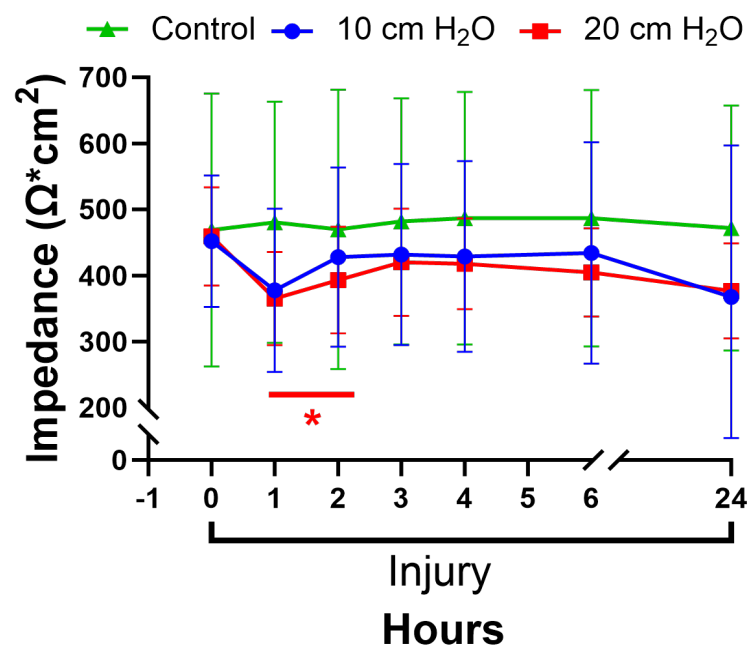

**Supplementary Figure 2. Actual impedance values vs. the reported % change of impedance for all volutrauma and barotrauma show similar trends and statistical significance.** Percent change of impedance and actual impedance values at 1 Hz were plotted for **A.** volutrauma and **B.** barotrauma. Statistical analysis was performed as described in Figure 4.

**A.****ATELECTRAUMA**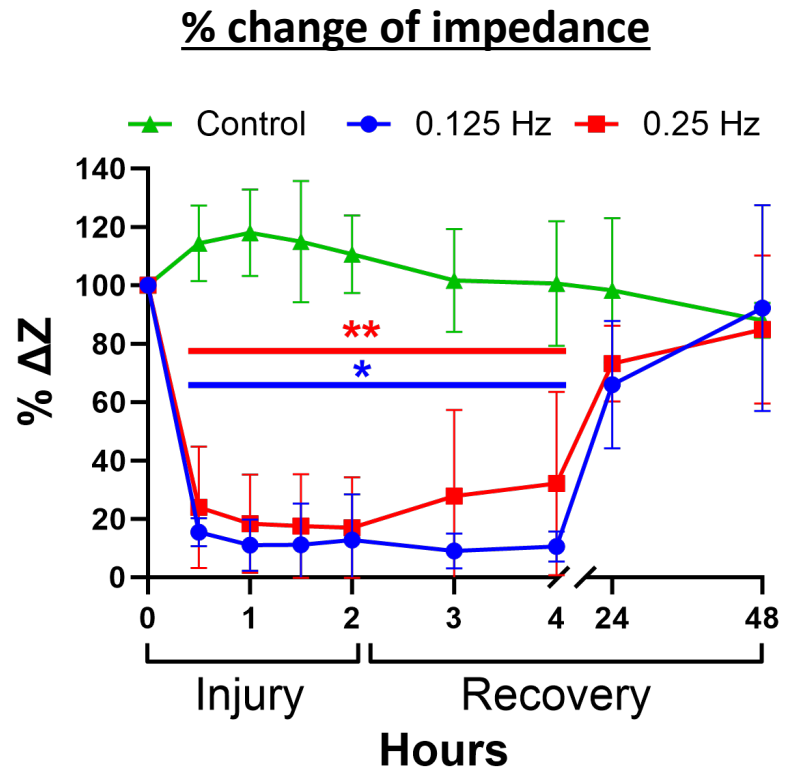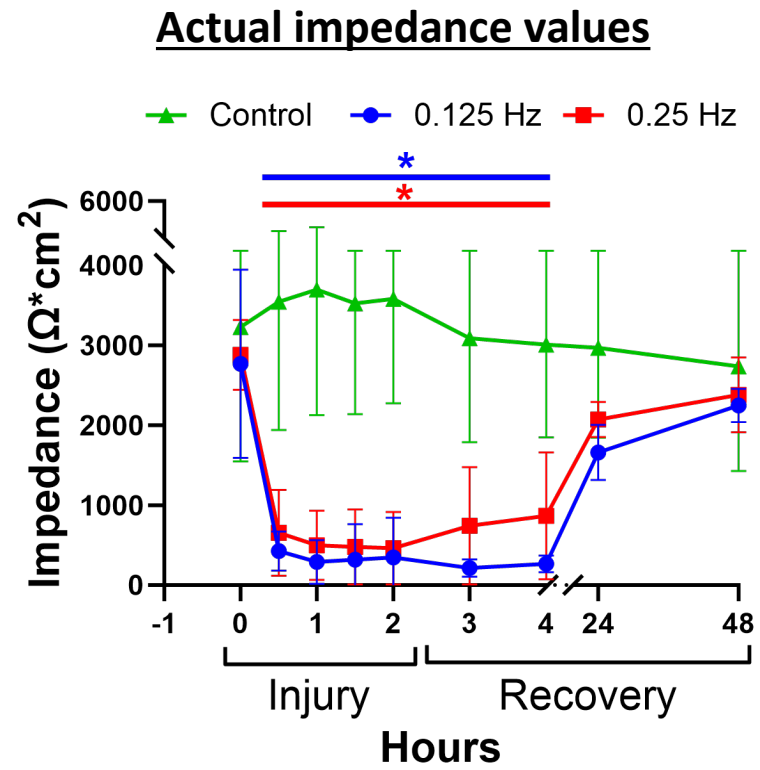

**Supplementary Figure 3. Actual impedance values vs. the reported % change of impedance for atelectrauma show similar trends and statistical significance.** Percent change of impedance and actual impedance values at 1 Hz were plotted for **A.** atelectrauma. Statistical analysis was performed as described in Figure 5.

**A.****0.25 HZ****% change of impedance**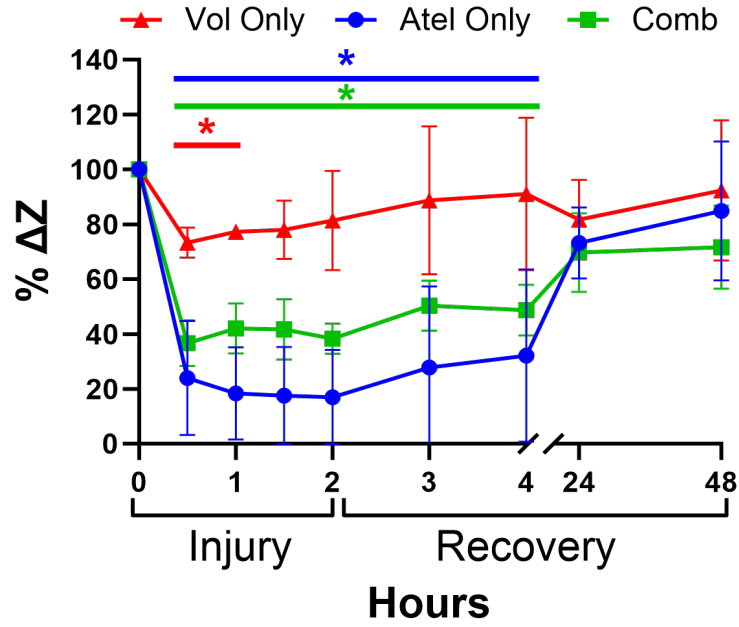**Actual impedance values**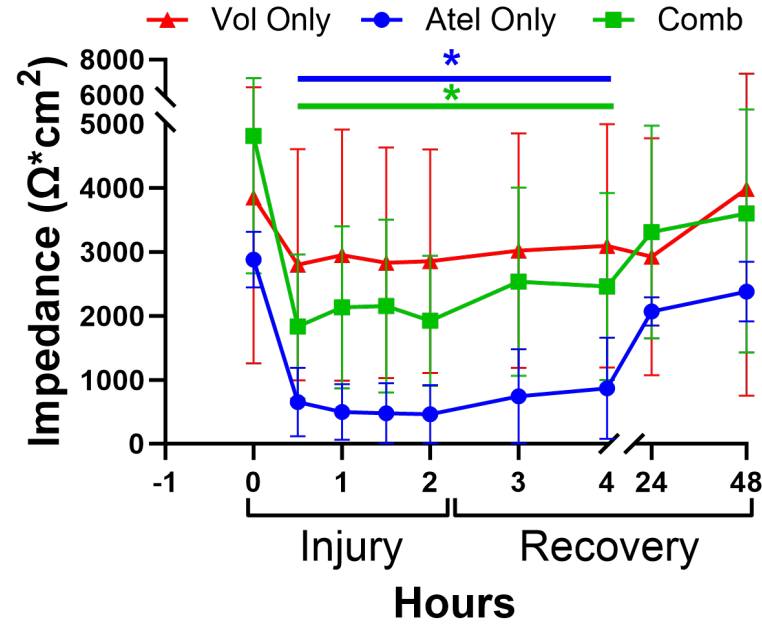

**Supplementary Figure 4. Actual impedance values vs. the reported % change of impedance for our combined injury model show similar trends and statistical significance.** Percent change of impedance and actual impedance values at 1 Hz were plotted for our combined injury model at **A.** 0.25 Hz and **B.** 0.125 Hz. Statistical analysis was performed as described in Figure 6.

**B.****0.125 HZ**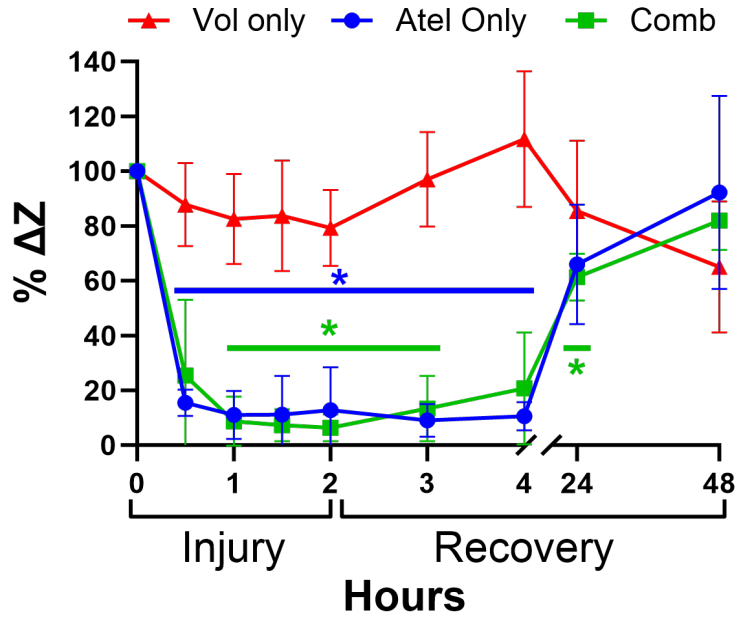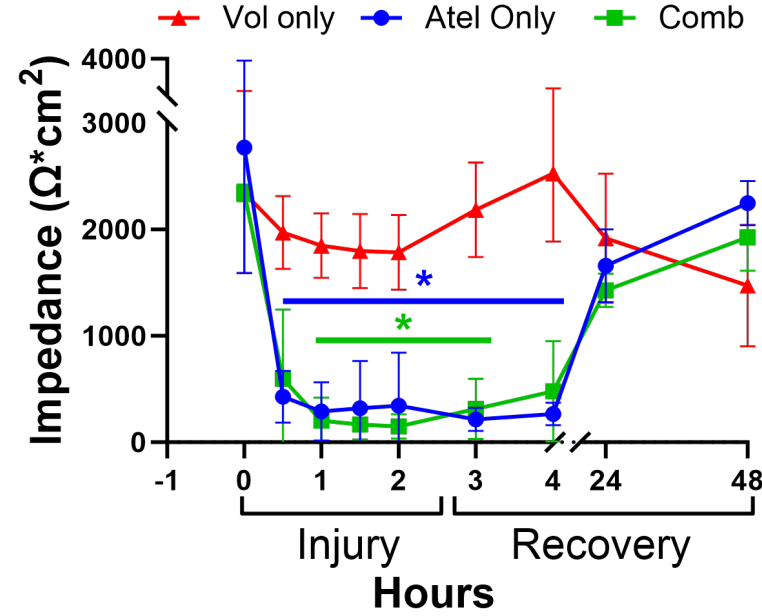

Supplement: d4lc00143e1.pdf [file d4lc00143e1.pdf]
